# Supplementary material
Source: PubMed Central journal article supplement (PMC7185689)
Supplement: izz191_suppl_supplementary_information.pdf [file izz191_suppl_supplementary_information.pdf]

**Table S1. Anti-Mouse Monoclonal Antibodies used for Flow Cytometry**

| <b>Antibody</b>                                   | <b>Conjugated Fluorophore</b> | <b>Clone</b>  | <b>Source</b>  |
|---------------------------------------------------|-------------------------------|---------------|----------------|
| <b>CD4</b>                                        | PE, APC                       | RM4-5         | BD Biosciences |
| <b>CD44</b>                                       | PE-Cy7                        | IM7           | eBioscience    |
| <b>CD62L</b>                                      | APC                           | MEL-14        | eBioscience    |
| <b>CD11c</b>                                      | APC-Cy7                       | HL3           | BD Biosciences |
| <b>CD317 (PDCA1)</b>                              | APC                           | 129C          | eBioscience    |
| <b>MHCII (I-A<sup>b</sup>)</b>                    | PE                            | AF6-120.1     | BD Biosciences |
| <b>F4/80</b>                                      | BV510                         | BM8           | Biolegend      |
| <b>CD80</b>                                       | PE-Dazzle 594                 | 16-10A1       | Biolegend      |
| <b>CD86</b>                                       | PE                            | GL1           | eBioscience    |
| <b>CD40</b>                                       | FITC                          | HM40-3        | BD Biosciences |
| <b>CD324 (E-Cadherin)</b>                         | FITC                          | 36/E-Cadherin | BD Biosciences |
| <b>CD45 RB</b>                                    | FITC                          | 16A           | BD Biosciences |
| <b>Smad2(pS465/pS467)/<br/>Smad3(pS423/pS425)</b> | PE                            | O72-670       | BD Biosciences |

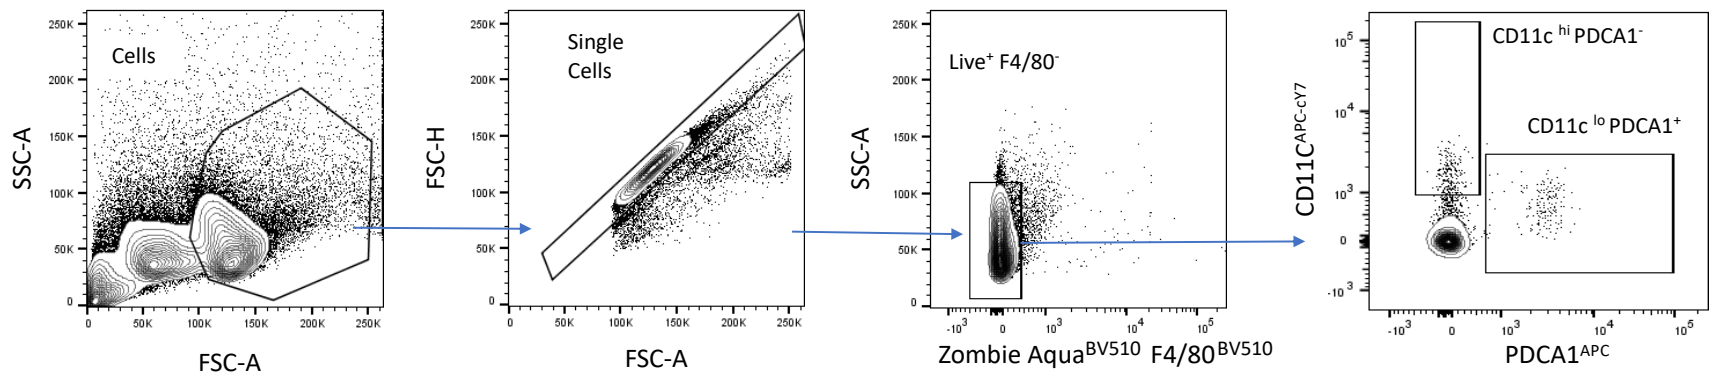

**Figure S1. Gating strategy for conventional and plasmacytoid DC identification.** Cells were gated by FSC-A and SSC-A. Unconjugated cells or doublets were gated out by FSC-A and FSC-H. Dead cells (Zombie Aqua<sup>BV510</sup> – positive) and macrophages (F4/80<sup>+</sup> cells) were excluded. Cells negative for Zombie Aqua<sup>BV510</sup> and F4/80<sup>BV510</sup> were further gated on the basis of CD11c and PDCA-1. CD11c<sup>hi</sup>PDCA-1<sup>-</sup> were considered as conventional DCs, whereas CD11c<sup>lo</sup>PDCA-1<sup>+</sup> cells were considered as plasmacytoid DCs.

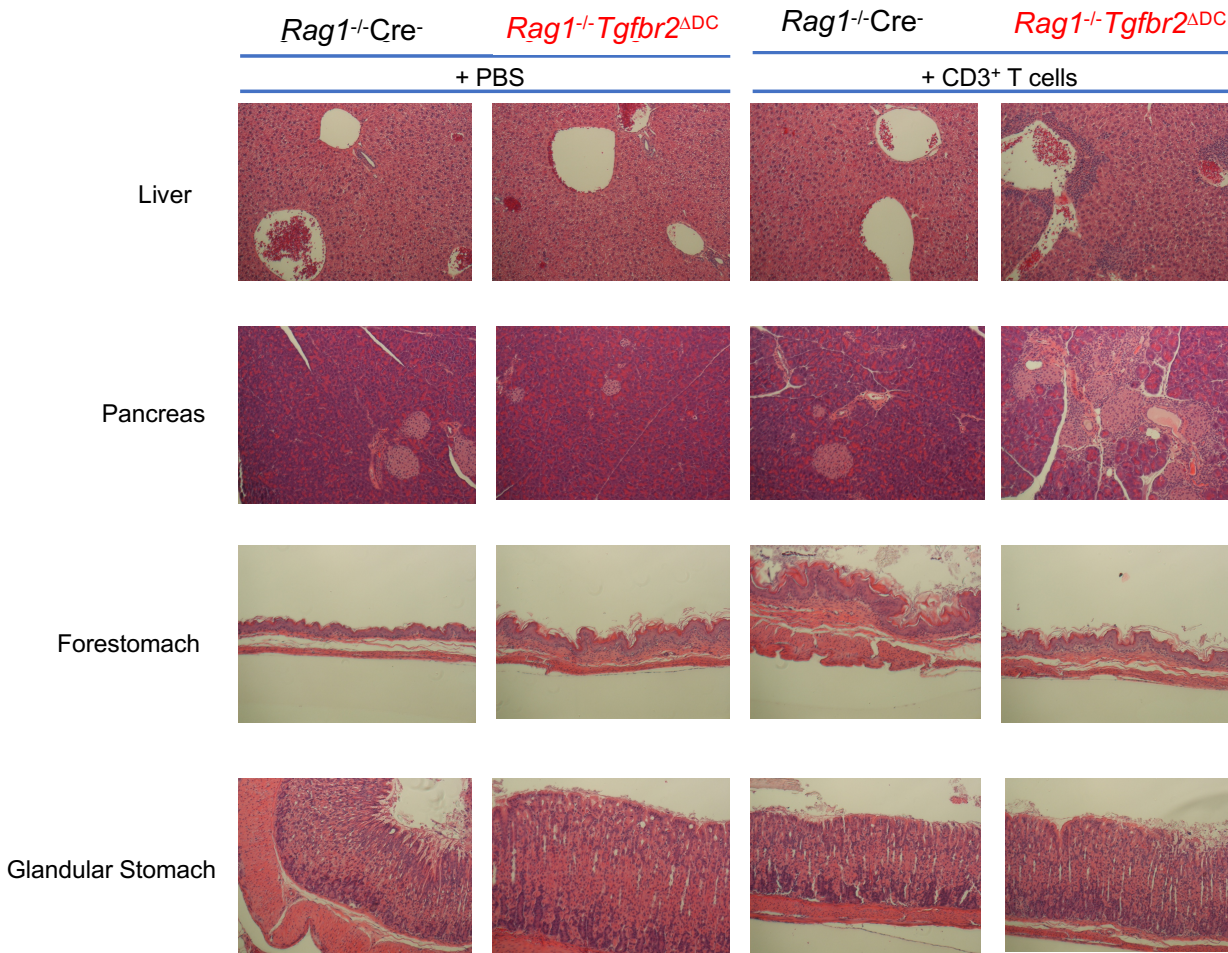

**Figure S2. Immunopathology in selected tissues of *Rag1*<sup>-/-</sup>Tgfbr2<sup>ΔDC</sup> mice following adoptive transfer of CD3<sup>+</sup> T cells.** *Rag1*<sup>-/-</sup>Cre<sup>-</sup> and *Rag1*<sup>-/-</sup>Tgfbr2<sup>ΔDC</sup> mice were injected with 10<sup>6</sup> CD3<sup>+</sup> T cells per mouse and monitored for 7 weeks. PBS-injected mice served as controls. After 7 weeks, mice were euthanized and liver, pancreas, forestomach and glandular stomach were harvested. Tissues were stained with H&E and evaluated for histological changes.

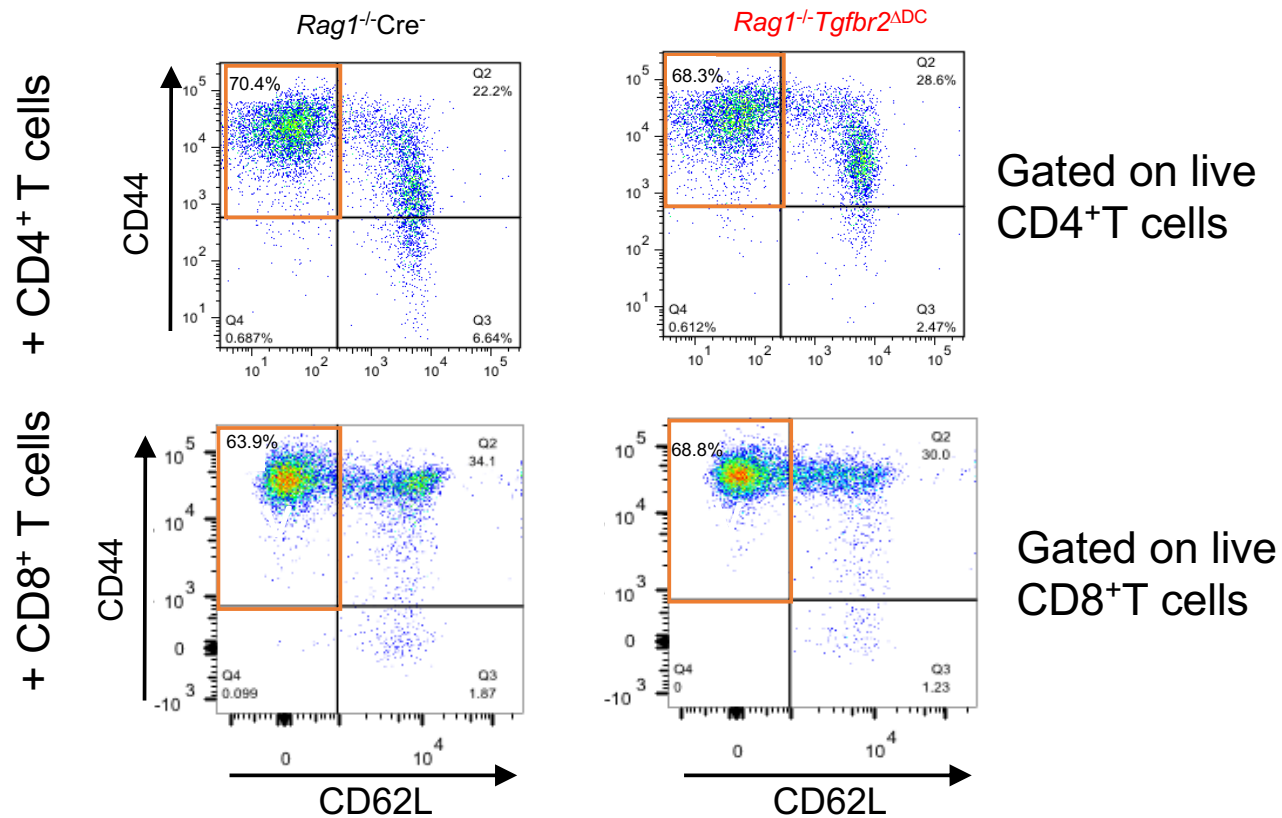

**Figure S3. Activation profile of T cells after selective adoptive transfer with CD4<sup>+</sup> or CD8<sup>+</sup> T cells in *Rag1*<sup>-/-</sup>Cre<sup>-</sup> or *Rag1*<sup>-/-</sup>Tgfb2<sup>ADC</sup> mice.** Single cells from MLNs were stained for CD4, CD8, CD44, and CD62L and subjected to flow cytometry analysis. The memory cells (CD44<sup>+</sup>CD62L<sup>-</sup>) cells were evaluated in cell populations gated on CD4<sup>+</sup> or CD8<sup>+</sup> T cells. Representative flow cytograms are presented.

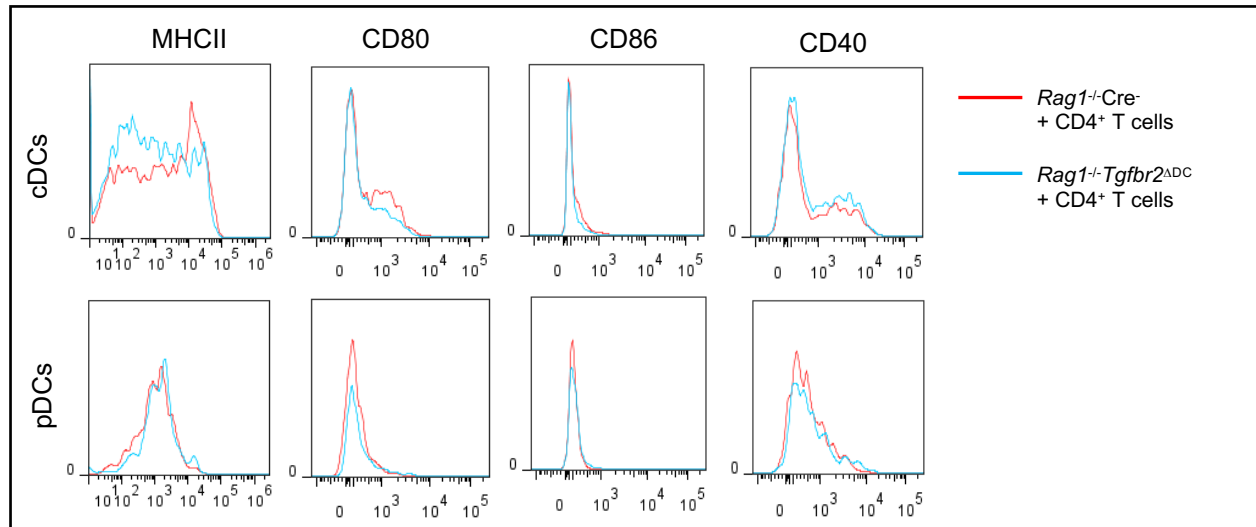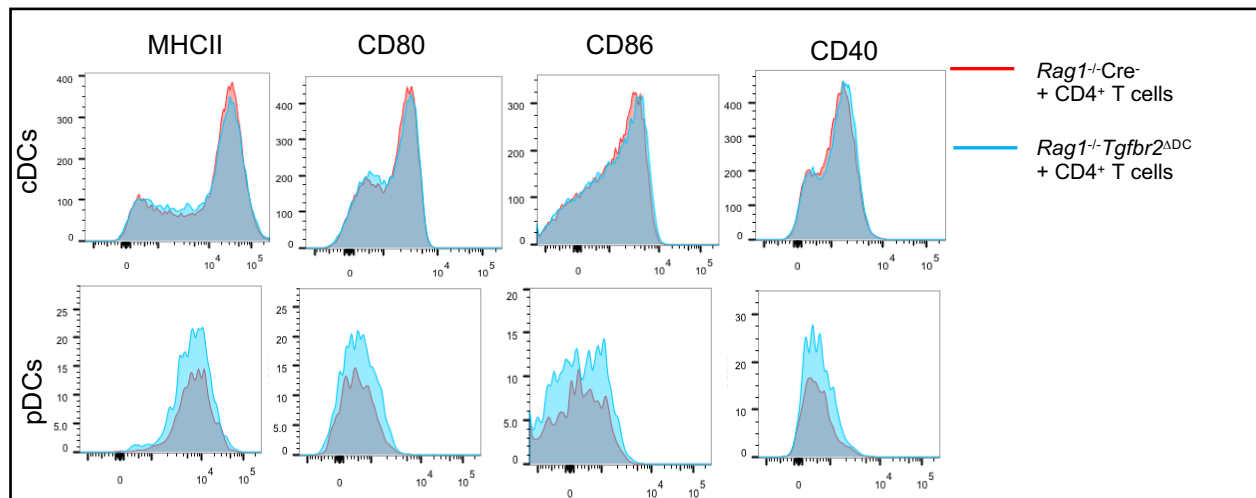

**Figure S4. Activation profile of dendritic cells after selective adoptive transfer with CD4<sup>+</sup> or CD8<sup>+</sup> T cells in *Rag1*<sup>-/-Cre</sup> or *Rag1*<sup>-/-Tgfb2<sup>ADC</sup></sup> mice.** Single cells from MLNs were stained for selected activation markers along with cell surface markers CD11c and PDCA1 to distinguish between conventional (CD11c<sup>hi</sup>PDCA1<sup>-</sup>) and plasmacytoid (CD11c<sup>lo</sup>PDCA1<sup>+</sup>) DCs. Representative histograms for activation markers MHCII, CD80, CD86 and CD40 are presented.
